# Supplementary material for: The In Vitro Effect of Prostaglandin E2 and F2α on the Chemerin System in the Porcine Endometrium during Gestation
Source: PubMed Central journal article supplement (PMC7432131; doi:10.3390/ijms21155213), 2020-07-23
Supplement: ijms-21-05213-s001.pdf [file ijms-21-05213-s001.pdf]

## Chemerin ELISA kit standard curve

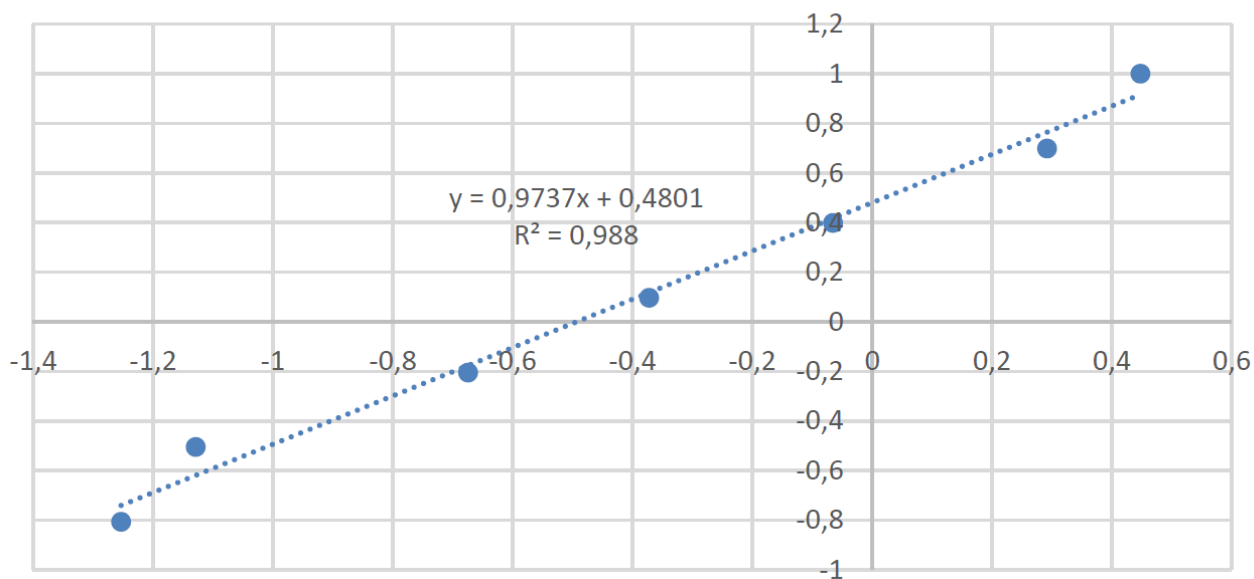

**Supplementray Figure 1.** Chemerin ELISA kit (FineTest, China) standard curve. The range of standard curve was 0.156–10 ng/mL. The sensitivity of the assay was approximately 0.1 ng/mL.

**Table S1.** Progesterone and chemerin concentrations, as well as number of corpora lutea (CL) and embryos in the research groups. Progesterone and chemerin concentrations has been reported as the means  $\pm$  S.E.M. ( $n = 5$ ).

| Research group             | Number of CLs/embryos      | Progesterone concentration in plasma (ng/mL) | Progesterone concentration in uterine luminal flushing (ng/mL) | Chemerin concentration in uterine luminal flushing (ng/mL) |
|----------------------------|----------------------------|----------------------------------------------|----------------------------------------------------------------|------------------------------------------------------------|
| Days 10 to 11 of gestation | 13–15 CLs                  | 16.3 $\pm$ 0.7                               | 0.3 $\pm$ 0.03                                                 | 89.74 $\pm$ 14.53                                          |
| Days 12 to 13 of gestation | 13–15 CLs                  | 14.7 $\pm$ 0.5                               | 1.0 $\pm$ 0.2                                                  | 460.25 $\pm$ 32.37                                         |
| Days 15 to 16 of gestation | 13–15 CLs                  | 12.9 $\pm$ 0.9                               | 1.0 $\pm$ 0.1                                                  | 281.58 $\pm$ 43.24                                         |
| Days 27 to 28 of gestation | 13–20 CLs<br>10–14 embryos | 11.7 $\pm$ 0.5                               | 0.8 $\pm$ 0.03                                                 | 7.72 $\pm$ 1.88                                            |
| Days 10 to 11 of the cycle | 13–15 CLs                  | 19 $\pm$ 3.4                                 | 1.1 $\pm$ 0.3                                                  | 96.29 $\pm$ 9.1                                            |
